# Supplementary material for: Trends in soil solution dissolved organic carbon (DOC) concentrations across European forests
Source: Copernicus journal article supplement (doi:10.5194/bg-2015-632), 2016-01-26
Supplement: Supplementary file 1 [file bg-2015-632-supplement.pdf]

## Supplementary material for

### Trends in soil solution dissolved organic carbon (DOC) concentrations across European forests

M. Camino-Serrano<sup>1</sup>, E. Graf Pannatier<sup>2</sup>, S. Vicca<sup>1</sup>, S. Luyssaert<sup>3</sup>, M. Jonard<sup>4</sup>, P. Ciais<sup>3</sup>, B. Guenet<sup>3</sup>, B. Gielen<sup>1</sup>, J. Peñuelas<sup>5,6</sup>, J. Sardans<sup>5,6</sup>, P. Waldner<sup>2</sup>, S. Etzold<sup>2</sup>, G. Cecchini<sup>7</sup>, N. Clarke<sup>8</sup>, Z. Galić<sup>9</sup>, L. Gandois<sup>10,11</sup>, K. Hansen<sup>12</sup>, J. Johnson<sup>13</sup>, U. Klinck<sup>14</sup>, Z. Lachmanová<sup>15</sup>, A.J. Lindroos<sup>16</sup>, H. Meesenburg<sup>14</sup>, T.M. Nieminen<sup>16</sup>, T.G.M. Sanders<sup>17</sup>, K. Sawicka<sup>18</sup>, W. Seidling<sup>17</sup>, A. Thimonier<sup>2</sup>, E. Vanguelova<sup>19</sup>, A. Verstraeten<sup>20</sup>, L. Vesterdal<sup>21</sup>, I.A. Janssens<sup>1</sup>

[1] {Department of Biology, PLECO, University of Antwerp, Belgium}

[2] {WSL, Swiss Federal Institute for Forest, Snow and Landscape Research, Zürcherstrasse 111, 8903, Birmensdorf, Switzerland}

[3] {Laboratoire des Sciences du Climat et de l'Environnement, LSCE/IPSL, CEA-CNRS-UVSQ, Université Paris-Saclay, F-91191 Gif-sur-Yvette, France }

[4] {UCL-ELI, Université catholique de Louvain, Earth and Life Institute, Croix du Sud 2, BE-1348 Louvain-la-Neuve , Belgium}

[5] {CREAF, Cerdanyola del Vallès, Catalonia, Spain}

[6] {CSIC, Global Ecology Unit CREAM-CSIC-UAB, Cerdanyola del Vallès, Catalonia, Spain}

[7] {Earth Sciences Department, University of Florence, Italy}

[8] {Norwegian Institute of Bioeconomy Research, , N-1431, Ås, Norway}

[9] {University of Novi Sad-Institute of Lowland Forestry and Environment, Serbia}

[10] {Université de Toulouse: UPS, INP, EcoLab (Laboratoire Ecologie fonctionnelle et Environnement), ENSAT, Castanet-Tolosan, France}

[11] {CNRS, EcoLab, Castanet-Tolosan, France}

[12] {IVL Swedish Environmental Research Institute, Natural Resources & Environmental Effects, SE-100 31, Stockholm, Sweden}

[13] {UCD School of Agriculture and Food Science, University College Dublin, Belfield, Ireland}

[14] {Northwest German Forest Research Station, Grätzelstr. 2, D-37079, Göttingen, Germany}

[15] {FGMRI, Forestry and Game Management Research Institute, Strnady 136, 252 02 Jiloviště, Czech Republic}

[16] {Natural Resources Institute Finland (Luke), P.O. Box 18, 01301 Vantaa, Finland }

[17] {Thünen Institute of Forest Ecosystems, Alfred-Möller-Strasse 1, D-16225, Eberswalde, Germany}

[18] {University of Reading, Environmental Science, UK}

[19] {Centre for Ecosystem, Society and Biosecurity, Forest Research, Alice Holt Lodge, Wrecclesham, Farnham, Surrey GU10 4LH, UK}

[20] {Research Institute for Nature and Forest (INBO), Kliniekstraat 25, BE-1070 Brussels, Belgium}

[21] {University of Copenhagen, Department of Geosciences and Natural Resource Management, Rolighedsvej 23, DK-1958 Frederiksberg C, Denmark}

**Supplementary material S1. List of ICP Forests Level II plots used for the trend analysis**

Table S1. List of ICP Forests Level II plots used for the trend analysis and their dominant forest species and resulting trend calculated using the Seasonal Mann-Kendall test (NS; non-significant, P: positive, N: negative). Rows in green correspond to the plots where at least one time series has been used for the individual trend analysis after filtering out the breakpoints. Rows in red correspond to the plots with measurements of DOC in soil solution that have not been used for the individual trend analysis because there was not enough data (Lack data) or breakpoints were detected (BP). Collector types are tension lysimeters (TL) or zero-tension lysimeters (ZTL).

| Country | Code plot | Start year | End year | Collector type | Tree species     | Trend     | Dilution effect        |
|---------|-----------|------------|----------|----------------|------------------|-----------|------------------------|
| France  | 1_6       | 1998       | 2011     | TL             | Quercus robur    | NS        |                        |
| France  | 1_17      | 1998       | 2011     | TL             | Quercus petraea  | NS        |                        |
| France  | 1_30      | 1998       | 2011     | TL             | Quercus petraea  | N         |                        |
| France  | 1_37      | 1998       | 2011     | TL             | Picea abies      | NS        |                        |
| France  | 1_41      | 1998       | 2011     | TL             | Picea abies      | N         |                        |
| France  | 1_46      | 1998       | 2011     | TL             | Picea abies      | NS/N      |                        |
| France  | 1_57      | 1998       | 2011     | ZTL            | Fagus sylvatica  | P/NS      |                        |
| France  | 1_63      | 1998       | 2011     | TL             | Fagus sylvatica  | NS/N      |                        |
| France  | 1_84      | 1998       | 2011     | TL             | Pinus sylvestris | N         |                        |
| France  | 1_90      | 1998       | 2011     | TL             | Abies alba       | NS/P      | depth= -0.2,<br>coll=1 |
| France  | 1_93      | 1998       | 2011     | TL             | Abies alba       | NS        |                        |
| France  | 1_96      | 1998       | 2011     | TL             | Abies alba       | P/NS      |                        |
| France  | 1_98      | 1998       | 2011     | TL             | Abies alba       | NS        |                        |
| France  | 1_100     | 1998       | 2011     | TL             | Abies alba       | NS        |                        |
| Belgium | 2_1       | 2000       | 2005     |                | Picea abies      | Lack data |                        |
| Belgium | 2_8       |            |          |                | Quercus petraea  | Lack data |                        |

|         |       |      |      |        |                  |            |                       |
|---------|-------|------|------|--------|------------------|------------|-----------------------|
| Belgium | 2_11  | 1999 | 2011 | ZTL/TL | Fagus sylvatica  | P          |                       |
| Belgium | 2_14  | 1999 | 2011 | ZTL/TL | Pinus nigra      | NS/P       |                       |
| Belgium | 2_15  | 1999 | 2011 | ZTL/TL | Pinus sylvestris | NS/P       |                       |
| Belgium | 2_16  | 1999 | 2011 | ZTL/TL | Quercus robur    | NS         |                       |
| Belgium | 2_21  | 1999 | 2011 | ZTL/TL | Fagus sylvatica  | P          |                       |
| Germany | 4_101 | 1996 | 2011 | TL     | Fagus sylvatica  | NS/N       |                       |
| Germany | 4_301 | 1997 | 2011 | TL     | Fagus sylvatica  | NS         |                       |
| Germany | 4_302 | 1997 | 2011 |        | Picea abies      | BP         |                       |
| Germany | 4_303 | 1998 | 2011 | TL     | Picea abies      | N          |                       |
| Germany | 4_304 | 1998 | 2011 | TL     | Fagus sylvatica  | N          |                       |
| Germany | 4_305 | 1998 | 2011 |        | Picea abies      | BP         |                       |
| Germany | 4_306 | 1996 | 2011 | TL     | Fagus sylvatica  | P          |                       |
| Germany | 4_307 | 1996 | 2011 | TL     | Pinus sylvestris | NS/P       | depth=-2.5,<br>coll=3 |
| Germany | 4_308 | 1993 | 2011 | TL     | Quercus robur    | N          |                       |
| Germany | 4_502 | 1998 | 2011 | TL     | Quercus robur    | N/NS       |                       |
| Germany | 4_503 | 1997 | 2011 |        | Fagus sylvatica  | BP         |                       |
| Germany | 4_506 | 1997 | 2011 | TL     | Picea abies      | NS         |                       |
| Germany | 4_603 | 1998 | 2005 |        | Fagus sylvatica  | Lack data  |                       |
| Germany | 4_604 | 1998 | 2001 |        | Fagus sylvatica  | Lack data  |                       |
| Germany | 4_605 | 1998 | 2005 |        | Fagus sylvatica  | Lack data  |                       |
| Germany | 4_606 | 1996 | 2011 | TL     | Fagus sylvatica  | NS         |                       |
| Germany | 4_607 | 1998 | 2010 |        | Fagus sylvatica  | Lack data  |                       |
| Germany | 4_701 | 1996 | 2011 | TL     | Picea abies      | Weight_N   |                       |
| Germany | 4_702 | 1996 | 2011 | TL     | Picea abies      |            |                       |
| Germany | 4_703 | 1996 | 2011 | TL     | Fagus sylvatica  | NS/P       |                       |
| Germany | 4_704 | 1996 | 2011 | TL     | Fagus sylvatica  | Weight_P   |                       |
| Germany | 4_705 | 1996 | 2011 | TL     | Quercus petraea  | N/Weight_N |                       |
| Germany | 4_706 | 1996 | 2011 | TL     | Quercus robur    | P/Weight_P |                       |

|         |       |      |      |        |                  |               |                     |
|---------|-------|------|------|--------|------------------|---------------|---------------------|
| Germany | 4_707 | 1996 | 2011 | TL     | Pinus sylvestris | P             |                     |
| Germany | 4_802 | 1997 | 2011 | TL     | Picea abies      | N             |                     |
| Germany | 4_806 | 1997 | 2011 | TL     | Picea abies      | P             |                     |
| Germany | 4_808 | 1997 | 2011 | TL     | Picea abies      | N/NS          |                     |
| Germany | 4_809 | 1997 | 2010 | TL     | Picea abies      | N/NS          |                     |
| Germany | 4_812 | 1997 | 2011 | TL     | Picea abies      | P/N/Weight_N  |                     |
| Germany | 4_901 | 1996 | 2011 | ZTL/TL | Pinus sylvestris | P/N           |                     |
| Germany | 4_902 | 1996 | 2011 | ZTL/TL | Picea abies      | NS            |                     |
| Germany | 4_903 | 1998 | 2011 | ZTL/TL | Fagus sylvatica  | P             |                     |
| Germany | 4_904 | 1996 | 2011 | ZTL/TL | Larix decidua    | NS            |                     |
| Germany | 4_905 | 1996 | 2011 | ZTL/TL | Pinus sylvestris | P/NS          |                     |
| Germany | 4_906 | 1996 | 2011 | ZTL/TL | Picea abies      | NS/P          |                     |
| Germany | 4_907 | 1996 | 2006 |        | Fagus sylvatica  | Lack data/BP  |                     |
| Germany | 4_908 | 1996 | 2011 | ZTL/TL | Picea abies      | NS/N          |                     |
| Germany | 4_909 | 1996 | 2011 | ZTL/TL | Picea abies      | NS/Weight_P/P | depth=-1.2, coll=15 |
| Germany | 4_910 | 1996 | 2006 |        | Quercus robur    | Lack data/BP  |                     |
| Germany | 4_911 | 1996 | 2011 | ZTL/TL | Fagus sylvatica  | P/Weight_P    |                     |
| Germany | 4_912 | 1996 | 2006 |        | Pinus sylvestris | Lack data/BP  |                     |
| Germany | 4_913 | 1996 | 2011 | ZTL/TL | Quercus petraea  | NS            |                     |
| Germany | 4_914 | 1996 | 2011 | ZTL/TL | Quercus petraea  | NS            |                     |
| Germany | 4_915 | 1996 | 2006 |        | Fagus sylvatica  | Lack data     |                     |
| Germany | 4_916 | 1996 | 2006 |        | Picea abies      | Lack data     |                     |
| Germany | 4_917 | 1996 | 2006 |        | Picea abies      | Lack data     |                     |
| Germany | 4_918 | 1996 | 2006 |        | Pinus sylvestris | Lack data     |                     |
| Germany | 4_919 | 1996 | 2011 | ZTL/TL | Fagus sylvatica  | N/P/NS        |                     |
| Germany | 4_920 | 1998 | 2011 | ZTL/TL | Picea abies      | P             |                     |
| Germany | 4_921 | 1997 | 2011 | ZTL/TL | Quercus petraea  | P/Weight_P    |                     |
| Germany | 4_922 | 1997 | 2011 | ZTL/TL | Picea abies      | P/N           | depth=-0.5, coll=6  |

|         |        |      |      |     |                  |           |  |
|---------|--------|------|------|-----|------------------|-----------|--|
| Germany | 4_1001 | 1998 | 2011 | TL  | Quercus robur    | P/NS      |  |
| Germany | 4_1201 | 2001 | 2007 |     | Pinus sylvestris | Lack data |  |
| Germany | 4_1202 | 2001 | 2011 | TL  | Pinus sylvestris | NS        |  |
| Germany | 4_1203 | 2000 | 2011 |     | Pinus sylvestris | BP        |  |
| Germany | 4_1204 | 2000 | 2011 | TL  | Pinus sylvestris | NS        |  |
| Germany | 4_1205 | 2000 | 2011 | TL  | Pinus sylvestris | NS        |  |
| Germany | 4_1206 | 2000 | 2007 |     | Pinus sylvestris | Lack data |  |
| Germany | 4_1302 | 1998 | 2011 | TL  | Fagus sylvatica  | N/P       |  |
| Germany | 4_1303 | 1997 | 2011 | TL  | Pinus sylvestris | NS        |  |
| Germany | 4_1401 | 1996 | 2012 | TL  | Picea abies      | NS/P      |  |
| Germany | 4_1402 | 1996 | 2012 | TL  | Picea abies      | P         |  |
| Germany | 4_1403 | 1996 | 2012 | TL  | Picea abies      | NS/P      |  |
| Germany | 4_1404 | 1996 | 2012 | TL  | Picea abies      | NS/P      |  |
| Germany | 4_1405 | 1996 | 2012 | TL  | Pinus sylvestris | NS        |  |
| Germany | 4_1406 | 1996 | 2011 | TL  | Quercus petraea  | P         |  |
| Germany | 4_1501 | 1998 | 2011 | TL  | Pinus sylvestris | N/P       |  |
| Germany | 4_1502 | 1998 | 2011 | TL  | Pinus sylvestris | N         |  |
| Germany | 4_1605 | 2007 | 2011 |     | Picea abies      | Lack data |  |
| Germany | 4_1606 | 2007 | 2011 |     | Fagus sylvatica  | Lack data |  |
| Germany | 4_1607 | 2007 | 2011 |     | Pinus sylvestris | Lack data |  |
| Germany | 4_1608 |      |      |     | Quercus petraea  | Lack data |  |
| Germany | 4_1609 |      |      |     | Abies alba       | Lack data |  |
| Italy   | 5_1    | 1999 | 2011 | ZTL | Fagus sylvatica  | N         |  |
| Italy   | 5_9    | 1999 | 2011 | ZTL | Quercus cerris   | NS        |  |
| UK      | 6_512  | 2004 | 2011 |     | Quercus robur    | Lack data |  |
| UK      | 6_517  | 2002 | 2010 |     | Quercus robur    | Lack data |  |

|         |         |      |      |                    |                  |              |  |
|---------|---------|------|------|--------------------|------------------|--------------|--|
| UK      | 6_715   | 2002 | 2011 | TL                 | Pinus sylvestris | NS           |  |
| UK      | 6_716   | 2002 | 2009 |                    | Pinus sylvestris | Lack data    |  |
| UK      | 6_919   | 2004 | 2011 |                    | Picea sitchensis | Lack data    |  |
| UK      | 6_920   |      |      |                    | Picea sitchensis | Lack data    |  |
| UK      | 6_922   | 1997 | 2011 | TL                 | Picea sitchensis | P            |  |
| Ireland | 7_1     | 1991 | 2000 | ZTL/TL             | Picea sitchensis | P/NS         |  |
| Ireland | 7_10    | 1991 | 2011 | ZTL and others/ TL | Picea sitchensis | NS/P         |  |
| Ireland | 7_11    | 1991 | 2011 | ZTL/TL             | Quercus petraea  | N/NS         |  |
| Denmark | 8_11    | 1996 | 2011 | TL                 | Picea abies      | NS           |  |
| Denmark | 8_34    | 1997 | 2011 | TL                 | Fagus sylvatica  | NS           |  |
| Denmark | 8_74    | 2002 | 2012 |                    | Fagus sylvatica  | Lack data/BP |  |
| Denmark | 8_85    | 2003 | 2011 |                    | Quercus robur    | Lack data    |  |
| Greece  | 9_3     |      |      |                    |                  | Lack data    |  |
| Greece  | 9_4     |      |      |                    |                  | Lack data    |  |
| Sweden  | 13_1301 | 1996 | 2006 |                    | Pinus sylvestris | Lack data    |  |
| Sweden  | 13_1403 | 1996 | 2006 |                    | Picea abies      | Lack data    |  |
| Sweden  | 13_5201 | 1996 | 2006 |                    | Pinus sylvestris | Lack data    |  |
| Sweden  | 13_5202 | 1996 | 2006 |                    | Picea abies      | Lack data    |  |
| Sweden  | 13_5401 | 1996 | 2006 |                    | Picea abies      | Lack data    |  |
| Sweden  | 13_5501 | 1996 | 2006 |                    | Picea abies      | Lack data    |  |
| Sweden  | 13_5502 | 1996 | 2006 |                    | Pinus sylvestris | Lack data    |  |
| Sweden  | 13_5601 | 1996 | 2006 |                    | Pinus sylvestris | Lack data    |  |
| Sweden  | 13_5602 | 1996 | 2006 |                    | Picea abies      | Lack data    |  |
| Sweden  | 13_5603 | 1996 | 2006 |                    | Picea abies      | Lack data    |  |
| Sweden  | 13_5701 | 1996 | 2006 |                    | Pinus sylvestris | Lack data    |  |
| Sweden  | 13_5702 | 1996 | 2006 |                    | Picea abies      | Lack data    |  |
| Sweden  | 13_5703 | 1996 | 2006 |                    | Picea abies      | Lack data    |  |
| Sweden  | 13_5801 | 1996 | 2006 |                    | Pinus sylvestris | Lack data    |  |

|         |         |      |      |     |                  |           |  |
|---------|---------|------|------|-----|------------------|-----------|--|
| Sweden  | 13_6001 | 1996 | 2006 |     | Fagus sylvatica  | Lack data |  |
| Sweden  | 13_6002 | 1996 | 2006 |     | Quercus robur    | Lack data |  |
| Sweden  | 13_6003 | 1996 | 2006 |     | Picea abies      | Lack      |  |
| Sweden  | 13_6102 | 1996 | 2006 |     | Fagus sylvatica  | Lack data |  |
| Sweden  | 13_6103 | 1996 | 2006 |     | Picea abies      | Lack      |  |
| Sweden  | 13_6301 | 2000 | 2006 |     | Fagus sylvatica  | Lack data |  |
| Sweden  | 13_6302 | 1996 | 2006 |     | Picea abies      | Lack      |  |
| Sweden  | 13_6401 | 1996 | 2006 |     | Pinus sylvestris | Lack data |  |
| Sweden  | 13_6501 | 1996 | 2006 |     | Picea abies      | Lack      |  |
| Sweden  | 13_6503 | 1996 | 2006 |     | Pinus sylvestris | Lack data |  |
| Sweden  | 13_6507 | 1996 | 2006 |     | Picea abies      | Lack      |  |
| Sweden  | 13_6601 | 1996 | 2006 |     | Picea abies      | Lack      |  |
| Sweden  | 13_6702 | 1996 | 2006 |     | Picea abies      | Lack      |  |
| Sweden  | 13_6703 | 1996 | 2006 |     | Picea abies      | Lack      |  |
| Sweden  | 13_6802 | 1996 | 2006 |     | Picea abies      | Lack      |  |
| Sweden  | 13_6803 | 1996 | 2006 |     | Pinus sylvestris | Lack data |  |
| Sweden  | 13_6901 | 1996 | 2006 |     | Picea abies      | Lack      |  |
| Sweden  | 13_7402 | 1996 | 2006 |     | Pinus sylvestris | Lack data |  |
| Sweden  | 13_7404 | 1996 | 2006 |     | Picea abies      | Lack      |  |
| Sweden  | 13_7501 | 1996 | 2006 |     | Pinus sylvestris | Lack data |  |
| Sweden  | 13_7502 | 1996 | 2006 |     | Picea abies      | Lack      |  |
| Austria | 14_9    | 1997 | 2010 | TL  | Fagus sylvatica  | N         |  |
| Austria | 14_16   | 2001 | 2010 | TL  | Picea abies      | NS        |  |
| Finland | 15_1    | 1998 | 2011 |     | Pinus sylvestris | Lack data |  |
| Finland | 15_3    | 1998 | 2011 |     | Picea abies      | Lack      |  |
| Finland | 15_5    | 1997 | 2011 |     | Picea abies      | Lack      |  |
| Finland | 15_6    | 1997 | 2011 |     | Pinus sylvestris | Lack data |  |
| Finland | 15_11   | 1997 | 2011 | ZTL | Picea abies      | NS        |  |
| Finland | 15_16   | 1998 | 2011 |     | Pinus sylvestris | Lack data |  |
| Finland | 15_17   | 1998 | 2011 |     | Picea abies      | Lack      |  |
| Finland | 15_19   | 1999 | 2011 |     | Picea abies      | Lack      |  |
| Finland | 15_20   | 1998 | 2011 |     | Pinus sylvestris | Lack data |  |
| Finland | 15_21   | 2000 | 2010 |     | Picea abies      | Lack      |  |

|                |         |      |      |                        |                   |            |  |
|----------------|---------|------|------|------------------------|-------------------|------------|--|
| Finland        | 15_23   | 1998 | 2010 |                        | Picea abies       | Lack       |  |
| Switzerland    | 50_2    | 1999 | 2012 | ZTL/TL                 | Picea abies       | P          |  |
| Switzerland    | 50_3    | 1999 | 2012 | Mix collector type one | Fagus sylvatica   | N/NS       |  |
| Switzerland    | 50_4    | 1999 | 2011 | ZTL/TL                 | Pinus cembra      | NS/P       |  |
| Switzerland    | 50_8    | 1999 | 2012 | ZTL/TL                 | Fagus sylvatica   | NS/P       |  |
| Switzerland    | 50_12   | 1999 | 2012 | ZTL/TL                 | Quercus cerris    | NS         |  |
| Switzerland    | 50_15   | 1999 | 2011 | ZTL/TL                 | Abies alba        | N          |  |
| Switzerland    | 50_16   | 1999 | 2012 | Mix collector type one | Fagus sylvatica   | N/P        |  |
| Norway         | 55_1    | 1996 | 2011 | ZTL/TL                 | Picea abies       | NS/N       |  |
| Norway         | 55_9    | 1996 | 2011 | TL                     | Picea abies       | P/Weight_P |  |
| Norway         | 55_14   | 1996 | 2011 | TL                     | Picea abies       | N          |  |
| Norway         | 55_18   | 1999 | 2010 | TL                     | Pinus sylvestris  | P          |  |
| Norway         | 55_19   | 1998 | 2011 | TL                     | Picea abies       | N          |  |
| Czech Republic | 58_521  | 2006 | 2011 |                        | Picea abies       | Lack data  |  |
| Czech Republic | 58_2015 | 2006 | 2011 |                        | Fagus sylvatica   | Lack data  |  |
| Czech Republic | 58_2361 | 2006 | 2011 |                        | Quercus fruticosa | Lack data  |  |
| Estonia        | 59_2    | 1999 | 2011 | ZTL                    | Pinus sylvestris  | NS/N       |  |
| Estonia        | 59_3    | 1999 | 2011 | ZTL                    | Pinus sylvestris  | NS         |  |
| Estonia        | 59_7    | 2002 | 2011 | ZTL                    | Pinus sylvestris  | NS         |  |



## Supplementary material S2. Description of the statistical methods

### 1) Overall trend analysis at European scale

Linear mixed-effects models (LMM) were used to detect the temporal trends in soil solution DOC concentrations at the European scale. For these models, the complete ICP Forests Level II dataset was used. Because the dependent variable (DOC concentration) was usually not normally distributed, it was log-transformed to improve normality. Different models were built per depth and per collector type (tension or zero-tension lysimeters). For each model, the variable describing the temporal effect was the year, centered on the year 2000 (year-2000), which was considered as fixed effect. Also, month (1-12) was considered as fixed effect to account for seasonality. Two random factors describing the country ( $ctry_{int}$ ) and plot ( $plot_{int}$ ) effects and one random coefficient accounting for the between plot variation of the temporal effect ( $plot_{slp}$ ) were considered in each LMM (Equation 1). The LMMs were further adjusted by stratification of data according to forest type in order to investigate possible differences in DOC trends between broadleaved and coniferous forests. The models were built following Jonard et al. (2015).

$$\log DOC = [a + month + ctry_{int}(0, \sigma_{ci}^2) + plot_{int}(0, \sigma_{pi}^2)] + [b + plot_{slp}(0, \sigma_{ps}^2)] \cdot (year - 2000) + \varepsilon(0, \sigma^2) \quad (1)$$

where  $\sigma_{ci}^2$ ,  $\sigma_{pi}^2$ ,  $\sigma_{ps}^2$  and  $\sigma^2$  are the variances of the random factors ‘country’ and ‘plot’, of the random coefficient ‘plot’ and of the residual term ( $\varepsilon$ ), respectively.

### 2) Trend analysis of individual time series

Temporal changes in terrestrial ecosystems can either be monotonic changes, or discontinuous with abrupt changes resulting in breakpoints (de Jong et al., 2013). Monotonicity of time series is generally assumed when analyzing DOC data for temporal

trends (Filella and Rodriguez-Murillo, 2014). However, it is rarely statistically tested and, thus, potential abrupt changes in the time series may be overlooked. This issue becomes important in temporal trend analysis since a breakpoint may cause changes in the direction of the trend and could lead us, for example, to classify a time series as constant, when in reality we may have averaged out separate periods with significant changes (de Jong et al., 2013). On the other hand, breakpoints may erroneously induce the detection of a significant trend in long-term time series due to artifacts.

For these reasons, we focused on the investigation of the potential long-term trends in soil solution DOC at European forests that show monotonicity. Therefore, DOC time series were first analyzed using the Breaks For Additive Seasonal and Trend (BFAST) algorithm to detect the presence of breakpoints (Verbesselt et al., 2010). When a breakpoint was detected in a time series, there were two possibilities: first, one of the segments (before or after the detected breakpoint) was longer than 9 years, and, in this case, only the longest segment was used for the subsequent analysis of monotonic trends; second, the breakpoint split the time series in two segments shorter than 9 years and then the time series was not used for the analysis of monotonic trends. We used a length threshold of 9 years, which is the minimum time series length recommended for long-term trend analysis (Libiseller and Grimvall, 2002; Waldner et al., 2014). In total, 258 time series from 97 plots were selected for analysis of monotonic trends. No clear pattern could be observed in the distribution of time series of DOC with breakpoints, which appeared to occur randomly across the study plots (Fig. 4 and 5).

Monotonic trend analyses were carried out using the Seasonal Mann Kendall (SMK) test for monthly DOC concentrations (Hirsch et al., 1982; Marchetto et al., 2013). Partial Mann Kendall (PMK) test was also used to test the influence of monthly precipitation as a co-variable, i.e., to test if the trend detection might be due to a DOC dilution/concentration effect

(Libiseller and Grimvall, 2002). For the SMK and PMK tests, the trend slopes were estimated following Sen (1968), as the median of all the slopes determined by all pairs of sample points. The SMK and PMK account for seasonality of the time series by computing the test on each of the seasons (in our case months) separately. The resulting slopes were also tested against the slopes calculated by BFAST. Finally, the individual slopes calculated according to Sen (1968) for each time series using the SMK or PMK method were standardized by dividing them by the median DOC concentration over the sampling period to avoid the influence of the magnitude of DOC concentration in the between-site comparison.

For this study, five depth intervals were considered: the organic layer (0 cm), topsoil (0-20 cm), intermediate (20-40 cm), subsoil (40-80 cm) and deep subsoil (> 80 cm). The slopes of each time series were then aggregated to a unique slope per depth interval in each plot (hereafter called “plot-soil depth combination”) and classified by the direction of the trend as significantly positive (P,  $p < 0.05$ ), significantly negative (N,  $p < 0.05$ ) and not significant (NS,  $p \geq 0.05$ ). When there was more than one collector per depth class, the median of the slopes was used when the direction of the trend (P, N or NS) was similar. When the different trends at the same plot-soil depth combination were either P and NS, or N and NS, it was marked as “Weighted positive” and “Weighted negative”. The five plot-soil depth combinations for which the calculated slopes showed opposite trend directions were discarded. All aggregated trend slopes came from time series measured using the same collector type.

Trends for soil solution parameters ( $\text{NO}_3^-$ ,  $\text{Ca}^{2+}$ ,  $\text{Mg}^{2+}$ ,  $\text{NH}_4^+$ ,  $\text{SO}_4^{-2}$ , total dissolved Al, total dissolved Fe, pH, electrical conductivity), precipitation and temperature were calculated using the same methodology as for DOC: individual time series were analyzed using the SMK test and the relative slopes were calculated and aggregated to plot-soil depth combinations.

Finally, we performed multivariate statistical analyses to investigate the main factors explaining differences in DOC trends among the selected plots. Firstly, we used General Discriminant Analysis (GDA) (Raamsdonk et al., 2001) to determine the importance of soil solution and deposition variables in the separation of groups with different trend classes (P, N, NS) in DOC. We also accounted for the part of the variance due to the different soil layers (depth interval) as an independent categorical variable. Secondly, we applied Structural Equation Models (SEM) to test whether deposition variables had an effect (direct, indirect or total) on DOC trends through different pathways (Grace et al., 2010). For the SEMs, we assumed that there is no effect of soil depth on the DOC trends (see Supplementary Material S3). We applied three SEM models: 1) for all the slopes in DOC, 2) only for the forests with low or medium total N deposition, and, 3) only for the forests with high total N deposition. For each case, we searched for the most parsimonious adequate model using the Akaike information criterion (AIC) and  $R^2$ . The significance level ( $p$  value) of the total, direct and indirect effects were calculated using the bootstrap (with 1200 repetitions) technique (Davison et al., 1986). Dependent variables were log-transformed to improve normality of the continuous variables and then standardized before performing the GDA and SEM. All the statistical analyses were performed in R software version 3.1.2 (R Core Team, 2014) using the “rkt” (Marchetto et al., 2013), “bfast01” (de Jong et al., 2013) and “sem” (Fox et al., 2013) packages, except for the GDA that was performed using Statistica 6.0 (StatSoft, Inc. Tule, Oklahoma, USA) and the LMMs that were performed using SAS 9.3 (SAS institute, Inc., Cary, NC, USA).

### Supplementary material S3. Depth effect on the individual trends in soil solution DOC

Trends in soil solution from different soil depth intervals were mixed for the Pearson's chi-squared test performed for Figure 6 and the Structural Equation Models (SEM) (Figure 11), as the number of cases available for each depth will be insufficient to compute the statistics if we separate per soil depth interval. To check if the trends calculated at different depths were actually independent from the soil depth interval, we performed a Pearson's chi-squared test and found that the differences in trends among soil depth intervals were not statistically significant ( $\chi^2(8, N = 174) = 10.94, p = 0.21$ ) (Fig. S1). Therefore, we assumed that there is no difference in trends among soil depth layers and performed the subsequent statistical analysis mixing the trends from different soil depths.

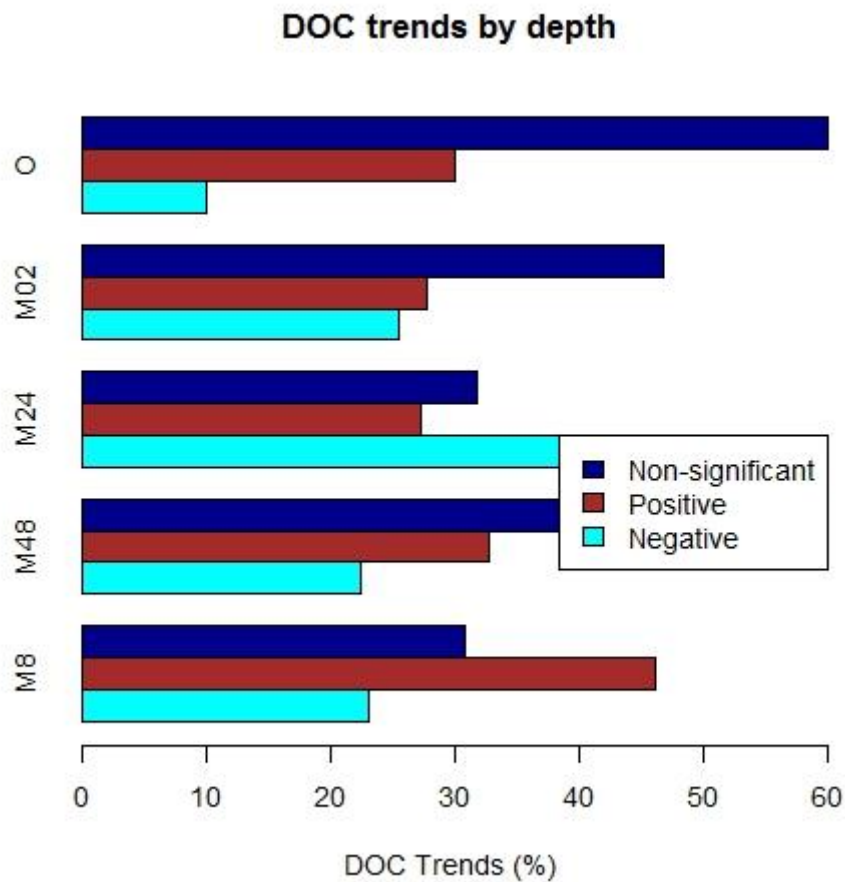

Figure S1. Percentage of non-significant, positive and negative trends per soil depth interval (O: organic layer, M02: mineral soil 0-20 cm, M24: mineral soil 20-40 cm, M48: mineral soil 40-80 cm, M8: mineral soil > 80 cm).

However, a real difference in DOC trends between soil depths may be obscured by the fact that datasets differ between different depths (not all the sites count with DOC time series that could be analyzed for trends at all the soil depth intervals) and thus, we cannot rule out that there exists a difference in trends per soil depth. Although the number of sites with DOC trends analyzed at more than three soil depths (including the organic layer) is not enough to apply the same statistics for this subset, we visually compared the 11 sites with this information available and found that, at first sight, it was confirmed that there is no a real difference in trends between soil depth intervals (Figure S2).

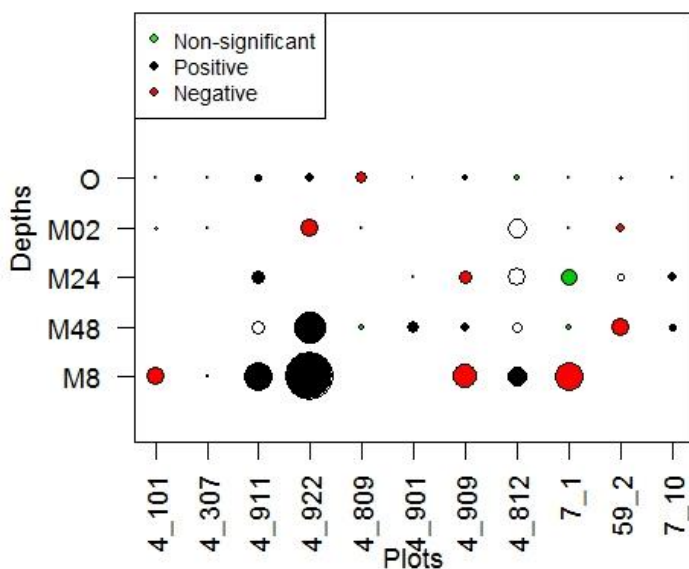

Figure S2. Direction of the trend (non-significant, positive and negative) per soil depth interval (O: organic layer, M02: mineral soil 0-20 cm, M24: mineral soil 20-40 cm, M48: mineral soil 40-80 cm, M8: mineral soil > 80 cm) for the 11 plots with DOC measured at least at 3 soil depth intervals including the organic layer. The size of the circle is proportional to the magnitude of the trend slope.

**Supplementary material S4. Structural equation model with trends in  $\text{SO}_4^{2-}$  and  $\text{NO}_3^-$  deposition**

The same structural equation models (SEM) represented in Figure 11 were performed using the trends in  $\text{SO}_4^{2-}$  and  $\text{NO}_3^-$  deposition ( $\% \text{ yr}^{-1}$ ) instead of the mean values of  $\text{SO}_4^{2-}$  and  $\text{NO}_3^-$  throughfall deposition ( $\text{kg ha}^{-1} \text{ yr}^{-1}$ ) (Figure S3). The SEMs for all the cases and for cases with low and medium N deposition are shown in Figure S3.

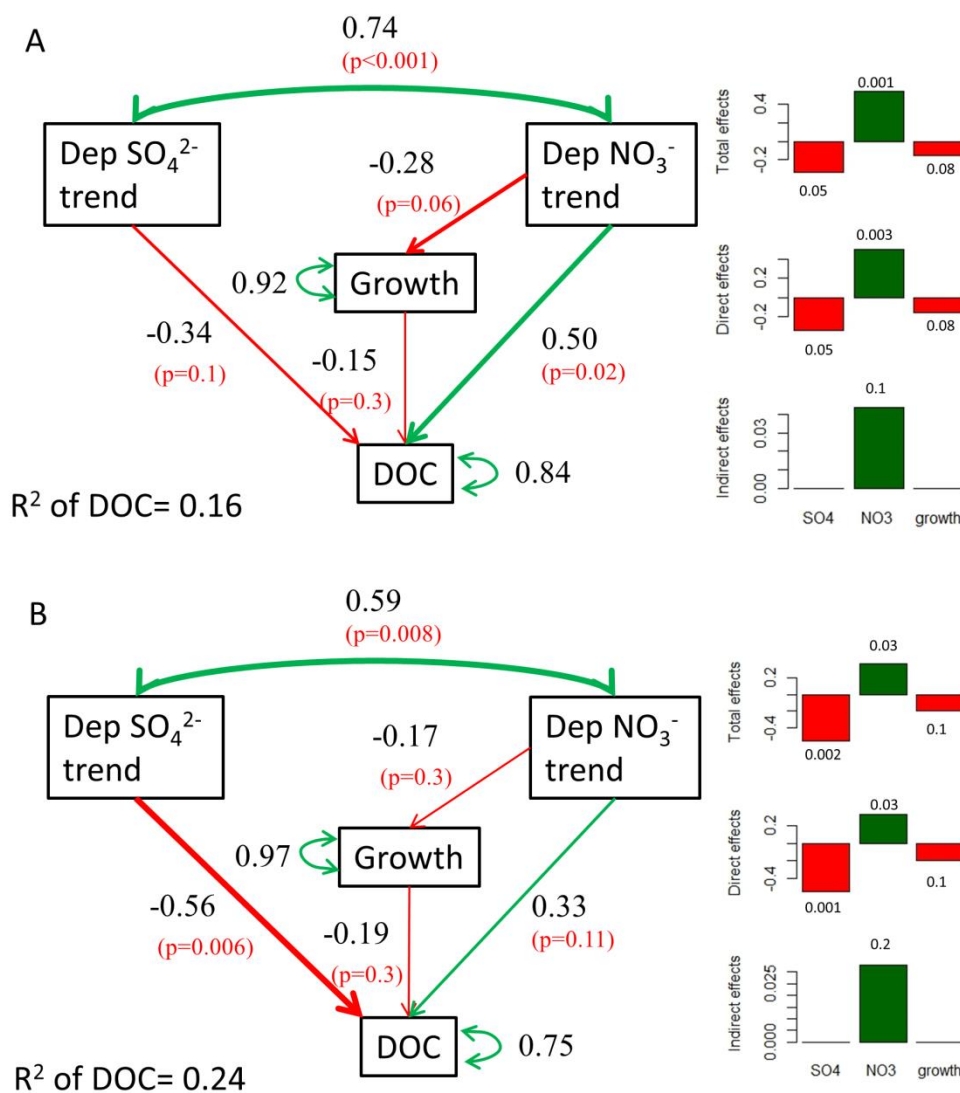

Figure S3. Diagram of the structural equation model (SEM) that best explains the maximum variance of the resulting trends of DOC concentrations in soil solution for: A) all the cases



and B) cases with low or medium N deposition, with trends in  $\text{SO}_4^{2-}$  and  $\text{NO}_3^-$  deposition ( $\% \text{ yr}^{-1}$ ) with direct effects and indirect effects through effects on mean annual stem volume increment (growth) in  $\text{m}^3 \text{ ha}^{-1} \text{ yr}^{-1}$ ). P-values of the significance of the corresponding effect between brackets. Green arrows indicate positive effects and red arrows indicate negative effects.

## References

- Davison, A. C., Hinkley, D. V., and Schechtman, E.: Efficient Bootstrap Simulation, *Biometrika*, 73, 555-566, 1986.
- de Jong, R., Verbesselt, J., Zeileis, A., and Schaepman, M. E.: Shifts in Global Vegetation Activity Trends, *Remote Sens-Basel*, 5, 1117-1133, 2013.
- Filella, M. and Rodriguez-Murillo, J. C.: Long-term Trends of Organic Carbon Concentrations in Freshwaters: Strengths and Weaknesses of Existing Evidence, *Water-Sui*, 6, 1360-1418, 2014.
- Fox, J., Nie, Z., and Byrnes, J.: *sem: Structural Equation Models.*, 2013.
- Grace, J. B., Anderson, T. M., Olf, H., and Scheiner, S. M.: On the specification of structural equation models for ecological systems, *Ecol Monogr*, 80, 67-87, 2010.
- Hirsch, R. M., Slack, J. R., and Smith, R. A.: Techniques of Trend Analysis for Monthly Water-Quality Data, *Water Resour Res*, 18, 107-121, 1982.
- Jonard, M., Furst, A., Verstraeten, A., Thimonier, A., Timmermann, V., Potocic, N., Waldner, P., Benham, S., Hansen, K., Merila, P., Ponette, Q., De La Cruz, A. C., Roskams, P., Nicolas, M., Croise, L., Ingerslev, M., Matteucci, G., Decinti, B., Bascietto, M., and Rautio, P.: Tree mineral nutrition is deteriorating in Europe, *Global Change Biol*, 21, 418-430, 2015.
- Libiseller, C. and Grimvall, A.: Performance of partial Mann-Kendall tests for trend detection in the presence of covariates, *Environmetrics*, 13, 71-84, 2002.
- Marchetto, A., Rogora, M., and Arisci, S.: Trend analysis of atmospheric deposition data: A comparison of statistical approaches, *Atmos Environ*, 64, 95-102, 2013.
- R Core Team: *R: A language and environment for statistical computing.*, R Foundation for Statistical Computing, Vienna, Austria, 2014.
- Raamsdonk, L. M., Teusink, B., Broadhurst, D., Zhang, N. S., Hayes, A., Walsh, M. C., Berden, J. A., Brindle, K. M., Kell, D. B., Rowland, J. J., Westerhoff, H. V., van Dam, K., and Oliver, S. G.: A functional genomics strategy that uses metabolome data to reveal the phenotype of silent mutations, *Nat Biotechnol*, 19, 45-50, 2001.
- Sen, P. K.: Estimates of the Regression Coefficient Based on Kendall's Tau, *Journal of the American Statistical Association*, 63, 1379-1389, 1968.
- Verbesselt, J., Hyndman, R., Newnham, G., and Culvenor, D.: Detecting trend and seasonal changes in satellite image time series, *Remote Sens Environ*, 114, 106-115, 2010.
- Waldner, P., Marchetto, A., Thimonier, A., Schmitt, M., Rogora, M., Granke, O., Mues, V., Hansen, K., Karlsson, G. P., Zlindra, D., Clarke, N., Verstraeten, A., Lazdins, A., Schimming, C., Iacoban, C., Lindroos, A. J., Vanguelova, E., Benham, S., Meesenburg, H., Nicolas, M., Kowalska, A., Apuhtin, V., Napa, U., Lachmanova, Z., Kristoefel, F., Bleeker, A., Ingerslev, M., Vesterdal, L., Molina, J., Fischer, U., Seidling, W., Jonard, M., O'Dea, P., Johnson, J., Fischer, R., and Lorenz, M.: Detection of temporal trends in atmospheric deposition of inorganic nitrogen and sulphate to forests in Europe, *Atmos Environ*, 95, 363-374, 2014.
